# Supplementary material for: Genome-Wide Comparison of the Target Genes of the Reactive Oxygen Species and Non-Reactive Oxygen Species Constituents of Cold Atmospheric Plasma in Cancer Cells
Source: PubMed Central journal article supplement (PMC7565996; doi:10.3390/cancers12092640), 2020-09-16
Supplement: cancers-12-02640-s001.pdf [file cancers-12-02640-s001.pdf]

## Genome-Wide Comparison of the Target Genes of the Reactive Oxygen Species and Non-Reactive Oxygen Species Constituents of Cold Atmospheric Plasma in Cancer Cells

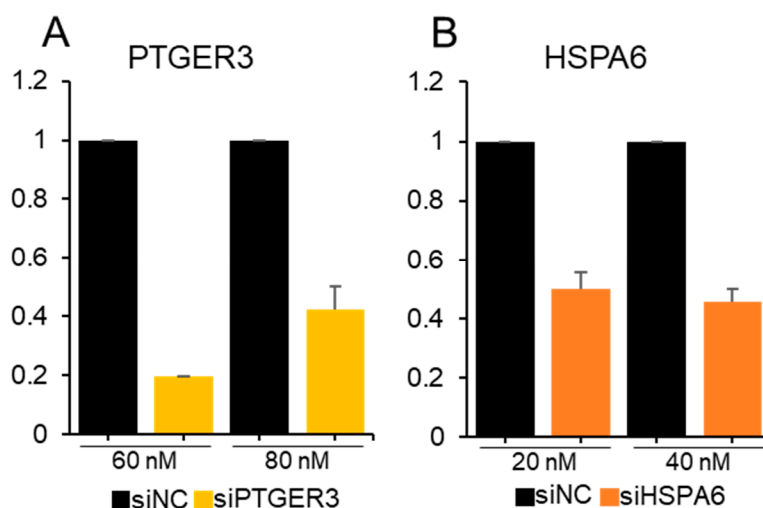

**Figure S1.** Induction of downregulation of PTGER3 and HSPA6 by a gene-specific siRNA in U937 cells. Cultured cells were transiently transfected with a gene-specific siRNA to downregulate PTGER3 (A) and HSPA6 (B) in U937 cells. Expression of the gene was determined by real-time RT-qPCR. Based on the downregulated level, 60 and 40 nM of siRNA were selected for PTGER3 and HSPA6, respectively. All experiments were performed in triplicate and indicated as mean  $\pm$  SE. siNC, negative control siRNA; siPTGER3, siRNA for PTGER3; siHSPA6, siRNA for HSPA6.

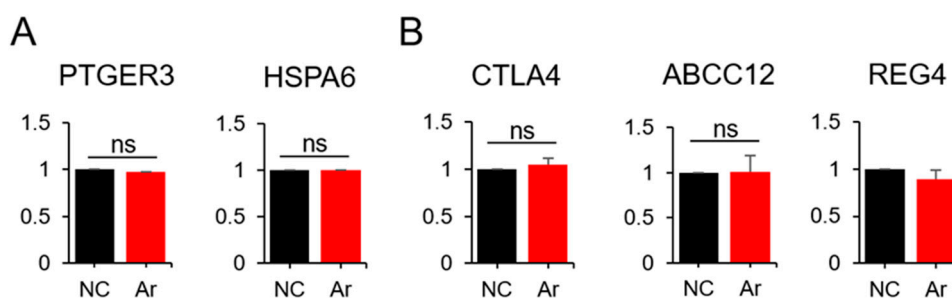

**Figure S2.** Effect of Ar gas on the expression of CAP- or H<sub>2</sub>O<sub>2</sub>-specific genes. To evaluate the effect of Ar gas alone on the expression of CAP- (A) or H<sub>2</sub>O<sub>2</sub>-specific genes (B), their expression was examined by RT-qPCR using RNA from the U937 cells treated with Ar gas or from non-treated cells. All assays were performed in triplicate, and the results are indicated as the mean  $\pm$  SE. ns, non-significant.

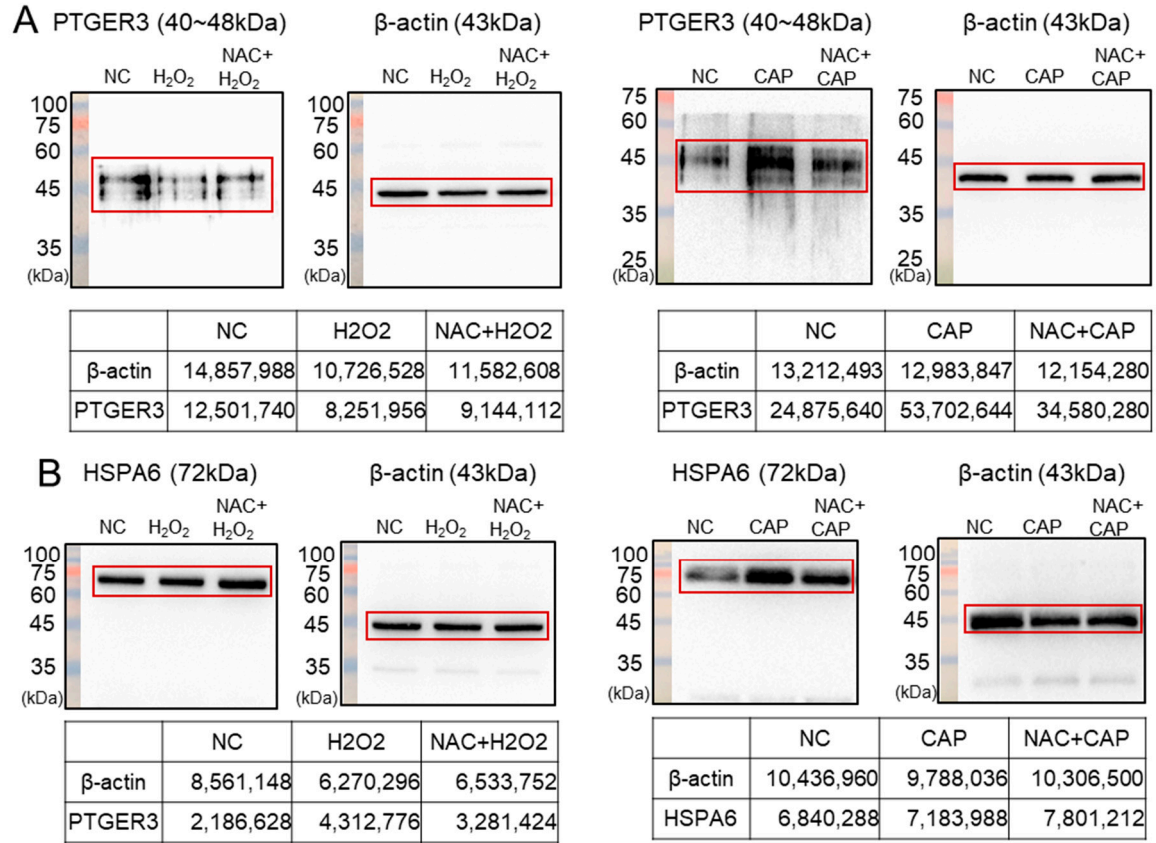

**Figure S3.** Uncropped blots corresponding to Western blots in the main text. Boxed areas correspond to the images in the main text. **(A)** Whole blots for Western blot analysis for Figure 5A. **(B)** Whole blots for Western blot analysis for Figure 5B.

**Table S1.** Information of primers for RT-qPCR and siRNAs used in this study.

| Gene Symbol |            | Sequence (5'-3')                 |  | Supplier |
|-------------|------------|----------------------------------|--|----------|
| qRT-PCR     |            |                                  |  |          |
| GAPDH       | F:         | ACATCGCTCAGACACCATG              |  | IDT      |
|             | R:         | TGTAGTTGAGGTCAATGAAGGG           |  |          |
| PTGER3      | F:         | GAGAGCAAGCGCAAGAAGTC             |  |          |
|             | R:         | CTTGGACAGGTACACGACGA             |  |          |
| HSPA6       | F:         | ACAGAGTGGCTGCCAAAAC              |  |          |
|             | R:         | CCTGTCCTCTTCGGGAATCT             |  |          |
| CTLA4       | F:         | GAGTATGCATCTCCAGGCAA             |  | Bionics  |
|             | R:         | TTCCCCATCATGTAGGTTGC             |  |          |
| ABCC12      | F:         | TGCCAAAAGATTTTCGAGTCC            |  |          |
|             | R:         | ACGCGTGTCTCTGGAATTT              |  |          |
| REG4        | F:         | TGTCATCTTGTCGTCTTCG              |  |          |
|             | R:         | CACTGTCAGCTTCTGGGTTG             |  |          |
| siRNA       |            |                                  |  |          |
| PTGER3      | Sense:     | GAAAGAUCUUCUUCGAAAAtt            |  | Bioneer  |
|             | Antisense: | UUUCGAAGAAGGAUCUUUCtt            |  |          |
| HSPA6       | Sense:     | GUCUCCAUGUGAAAGGUUtt             |  |          |
|             | Antisense: | AACCUUCACAUGGAAGACTt             |  |          |
| control     |            | Negative control siRNA (SN-1003) |  |          |

**Table S2.** Genes with highly altered expression in U937 and SK-mel-147 cells after treatment with H<sub>2</sub>O<sub>2</sub> and CAP.

| Gene symbol | Accession No. | Description                                 | U937                                       |                        | SK-mel-147            |                       |                        |
|-------------|---------------|---------------------------------------------|--------------------------------------------|------------------------|-----------------------|-----------------------|------------------------|
|             |               |                                             | H <sub>2</sub> O <sub>2</sub> <sup>a</sup> |                        |                       |                       |                        |
|             |               |                                             | 4 h                                        | 18 h                   | 3 h                   | 6 h                   | 24 h                   |
| REG4        | NM_032044     | regenerating family member 4                | 0.429                                      | 0.371                  | 2.990                 | 2.791                 | 3.520                  |
| CTLA4       | NM_005214     | cytotoxic T-lymphocyte associated protein 4 | 0.275                                      | 0.225                  | 3.124                 | 4.992                 | 4.604                  |
| MEG3        | NR_003531     | maternally expressed 3                      | 0.283                                      | 0.328                  | 2.409                 | 2.783                 | 2.918                  |
| ABCC12      | NM_033226     | ATP binding cassette subfamily C member12   | 2.462                                      | 4.959                  | 3.023                 | 2.963                 | 4.412                  |
|             |               |                                             | CAP                                        |                        |                       |                       |                        |
|             |               |                                             | 120 s_3 h <sup>b</sup>                     | 120 s_3 h <sup>c</sup> | 20 s_3 h <sup>b</sup> | 60 s_3 h <sup>b</sup> | 180 s_3 h <sup>b</sup> |
| PTGER3      | NM_198717     | prostaglandin E receptor 3                  | 3.317                                      | 3.411                  | 6.685                 | 0.380                 | 2.136                  |
| HSPA6       | NM_002155     | heat shock protein family A member 6        | 13.642                                     | 18.379                 | 0.439                 | 0.458                 | 2.209                  |

<sup>a</sup> The values are obtained by dividing the expression level of 3–24 h H<sub>2</sub>O<sub>2</sub> treated cells by that of untreated cells. <sup>b</sup> The values are obtained by dividing the expression level of 20–180 s Ar-CAP treated and 3 h maintained cells by that of untreated cells. <sup>c</sup> The values are obtained by dividing the expression level of 120 s Ar+N<sub>2</sub>-CAP treated and 3 h maintained cells by that of untreated cells.

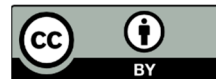

© 2020 by the authors. Licensee MDPI, Basel, Switzerland. This article is an open access article distributed under the terms and conditions of the Creative Commons Attribution (CC BY) license (<http://creativecommons.org/licenses/by/4.0/>).
